# Supplementary material for: Inlay of ultrafine Ru nanoparticles into a self-supported Ni(OH)2 nanoarray for hydrogen evolution with low overpotential and enhanced kinetics
Source: Royal Society of Chemistry journal article supplement (doi:10.1039/c9ta02451d), 2019-01-01
Supplement: c9ta02451d1.pdf [file c9ta02451d1.pdf]

## Electronic Supplementary Information

### **Inlay Ultrafine Ru Nanoparticles into Self-supported Ni(OH)<sub>2</sub> Nanoarray for Hydrogen Evolution with Low Overpotential and Enhanced Kinetics**

*Qian-Qian Chen,<sup>a,c</sup> Xiao Yang,<sup>a</sup> Chun-Chao Hou,<sup>a</sup> Kai Li,<sup>\*b</sup> and Yong Chen<sup>\*a,c</sup>*

<sup>a</sup>Key Laboratory of Photochemical Conversion and Optoelectronic Materials & HKU-CAS Joint Laboratory on New Materials, Technical Institute of Physics and Chemistry, Chinese Academy of Sciences, Beijing 100190, People's Republic of China

<sup>b</sup>Shenzhen Key Laboratory of Polymer Science and Technology, College of Materials Science and Engineering, Shenzhen University, Xueyuan Blvd 1066, Shenzhen 518055, P. R. China

<sup>c</sup>University of Chinese Academy of Sciences, Beijing 100049, People's Republic of China

E-mail: [chenyong@mail.ipc.ac.cn](mailto:chenyong@mail.ipc.ac.cn), [kaili@szu.edu.cn](mailto:kaili@szu.edu.cn)

\*Corresponding Author

## Experimental Section

**Materials:** All chemicals and solvents were obtained commercially and used without further purification.

**Synthesis of the NiFe LDH/NF:** NiFe LDH/NF was prepared as reported with urea as precipitant. In detail, 0.4 mmol  $\text{Ni}(\text{OH})_2 \cdot 6\text{H}_2\text{O}$ , 0.4 mmol  $\text{Fe}(\text{OH})_3 \cdot 9\text{H}_2\text{O}$  and 120 mg urea were dissolved into 15 mL water. Then the solution was transferred to a 25 mL Teflon-lined stainless-steel autoclave with a cleaned Ni foam (1 cm × 3 cm), which was sealed and maintained at 120 °C for 12 h in an electric oven, and then allowed to cool to room temperature to obtain NiFe LDH/NF.

**Synthesis of the  $\text{Ni}(\text{OH})_2/\text{NF}$ :** A piece of Ni foam (1 cm × 3 cm) was immersed into a 15 mL solution containing 1 mM  $\text{Ni}(\text{OH})_2 \cdot 6\text{H}_2\text{O}$  and 10 mM urea. Then the above solution was transferred to a 25 mL Teflon-lined stainless-steel autoclave, which was sealed and maintained at 120 °C for 12 h in an electric oven, and then allowed to cool to room temperature to obtain  $\text{Ni}(\text{OH})_2/\text{NF}$ .

**Synthesis of Ru NPs:** 100 mg  $\text{RuCl}_3 \cdot x\text{H}_2\text{O}$  was dissolved in 5 mL  $\text{H}_2\text{O}$  which was recorded as solution A. Then, 10 mL  $\text{NaBH}_4$  aqueous solution (containing 200 mg  $\text{NaBH}_4$ ) was dropped into solution A slowly. The mixed solution was maintained at 100 °C for 2 h to obtain Ru NPs.

**The preparation of Pt/C, Ru NPs and RuO<sub>2</sub> electrode:** Typically, 25 mg commercial 10% Pt/C, Ru NPs or RuO<sub>2</sub> was dispersed in 1 mL mixture containing 500  $\mu$ L water, 440  $\mu$ L ethanol, 60  $\mu$ L Nafion solution, and then the mixture was sonicated for more than 1 h to generate an uniform catalyst ink. Next, 16  $\mu$ L of the dispersion was dropped onto 0.5  $\times$  0.5 cm<sup>2</sup> Ni foam (1.6 mg cm<sup>-2</sup>) carefully and dried at room temperature overnight to obtain Pt/C and RuO<sub>2</sub> electrode.

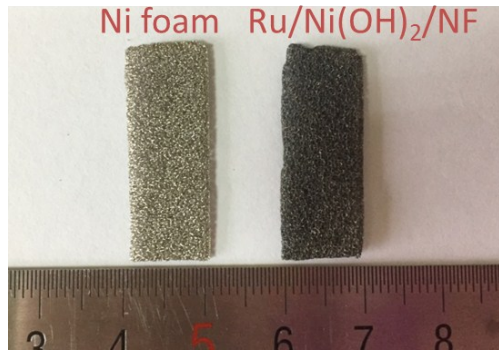

**Fig. S1.** Ni foam (left) and Ru/Ni(OH)<sub>2</sub>/NF (right).

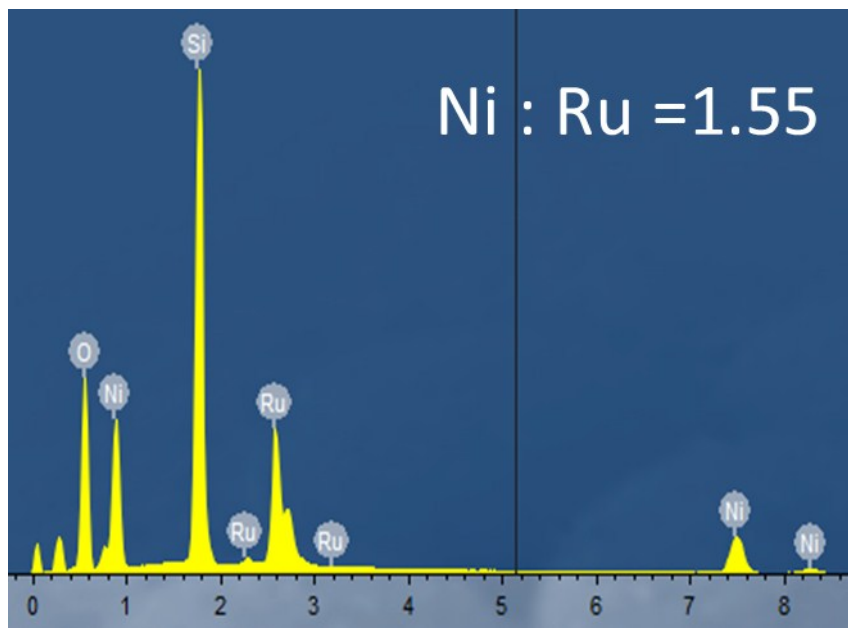

**Fig. S2.** EDS spectrum of Ru/Ni(OH)<sub>2</sub> scratched from the Ru/Ni(OH)<sub>2</sub>/NF. Si peak is originated from Si substrate.

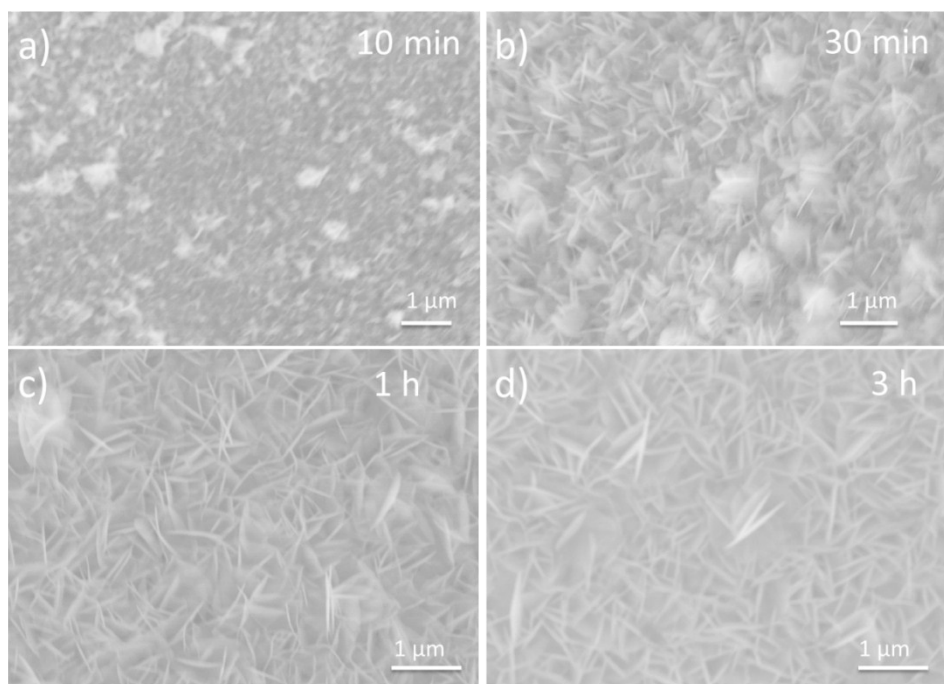

**Fig. S3.** Samples synthesized at different time scales. 10 min (a), 30 min (b), 1 h (c) and 3 h (d).

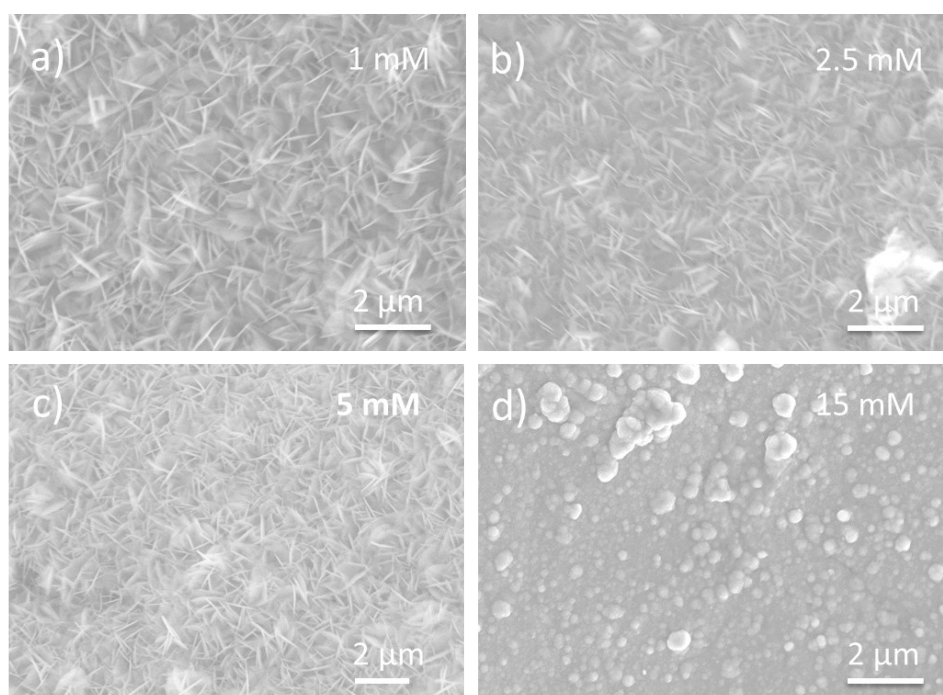

**Fig. S4.** Samples synthesized at different concentrations of  $\text{RuCl}_3$  solution. 1.0 mM (a), 2.5 mM (b), 5.0 mM (c), 15.0 mM (d).

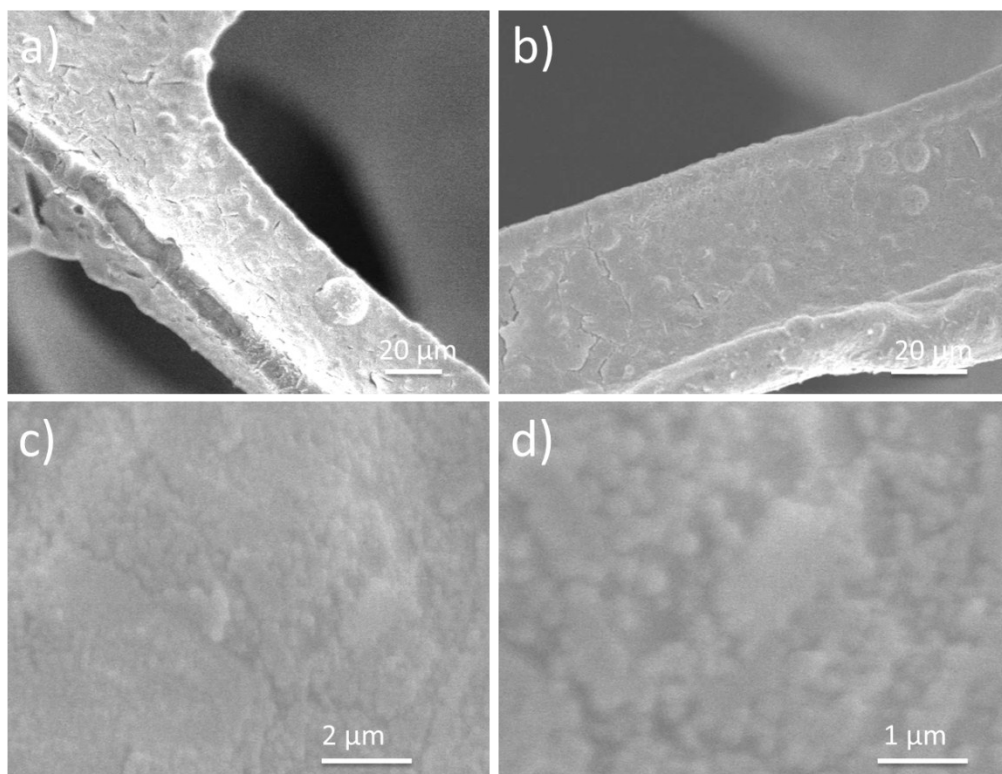

**Fig. S5.** Samples synthesized under Ar atmosphere.

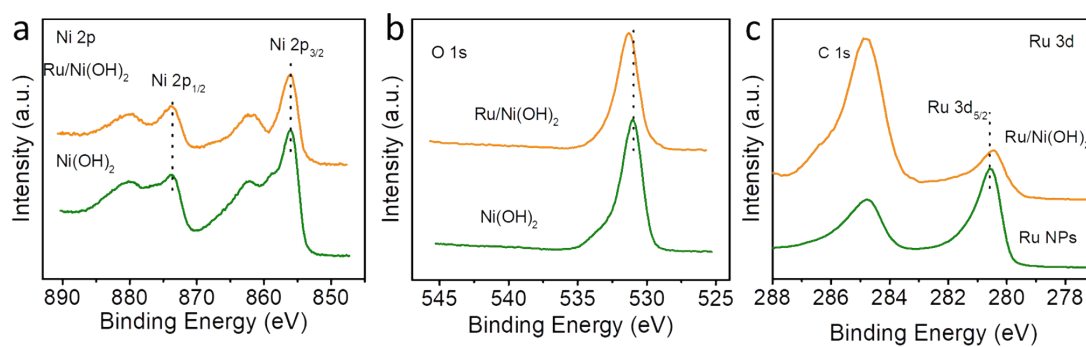

**Fig. S6.** High resolution XPS of Ru/Ni(OH)<sub>2</sub>, Ni(OH)<sub>2</sub> and Ru NPs. (a) Ni 2p, (b) O 1s, (c) Ru 3d.

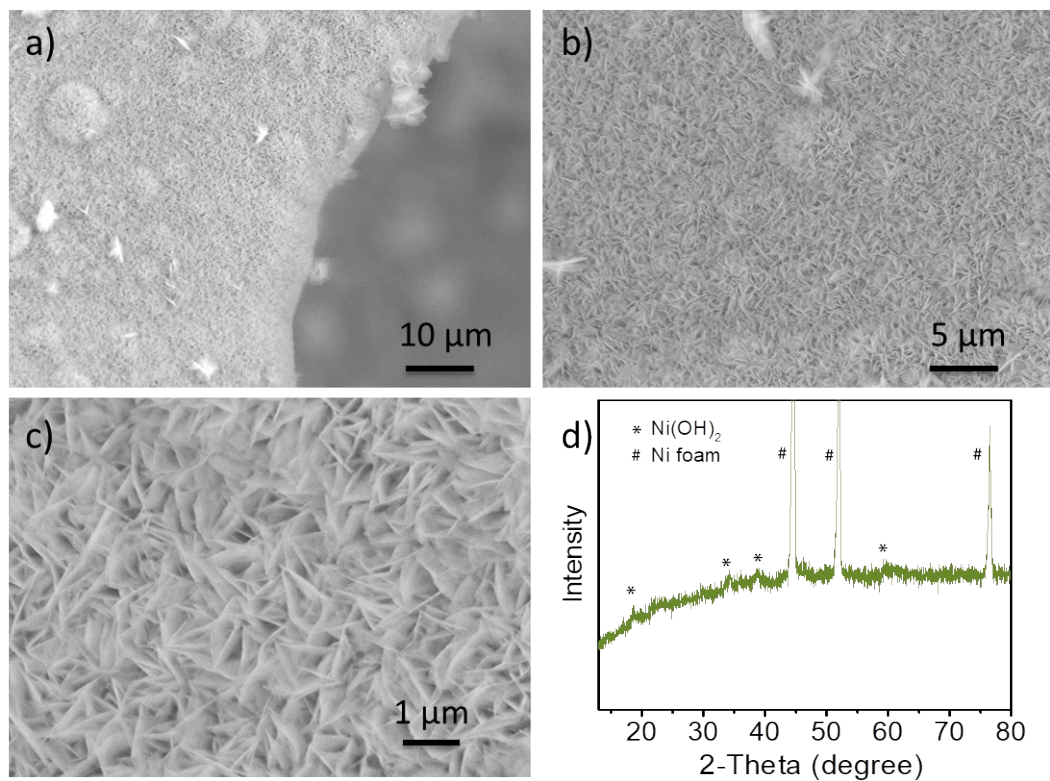

**Fig. S7.** (a-c) SEM images and (d) XRD pattern of Ni(OH)<sub>2</sub>/NF.

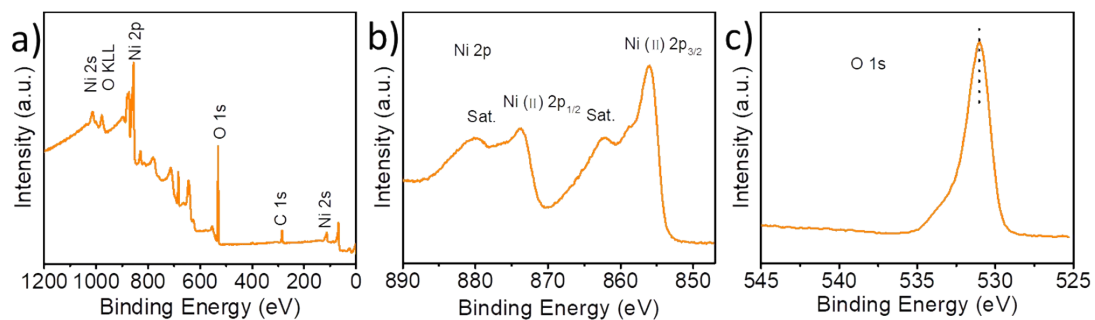

**Fig. S8.** XPS spectra of Ni(OH)<sub>2</sub>.

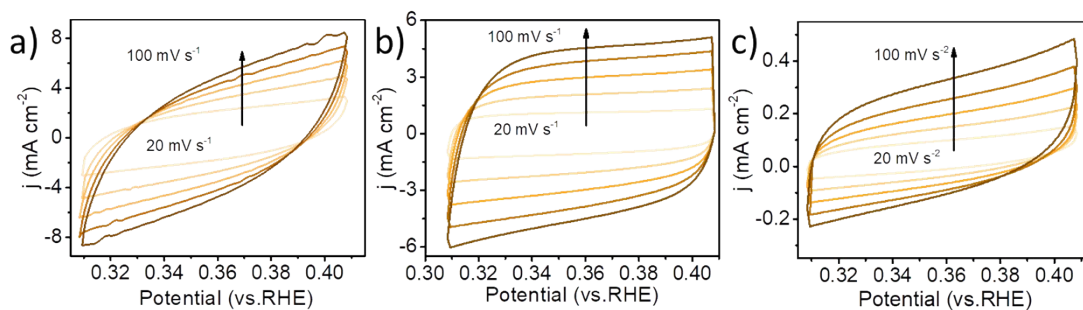

**Fig. S9.** CV curves for the as-prepared Ru/Ni(OH)<sub>2</sub>/NF (a), Ru NPs/NF (b) and Ni(OH)<sub>2</sub>/NF (c).



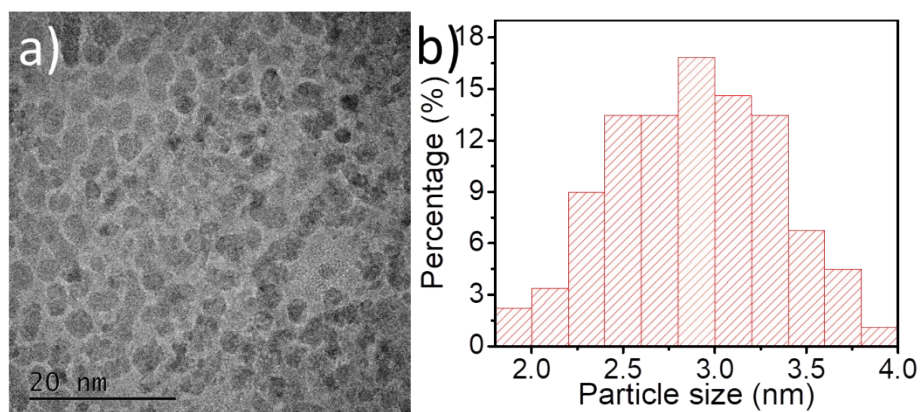

**Fig. S10.** (a) TEM image of Ru/Ni(OH)<sub>2</sub> after 20 h HER at 20 mA cm<sup>-2</sup>, (b) the size distribution of Ru NPs in (a).

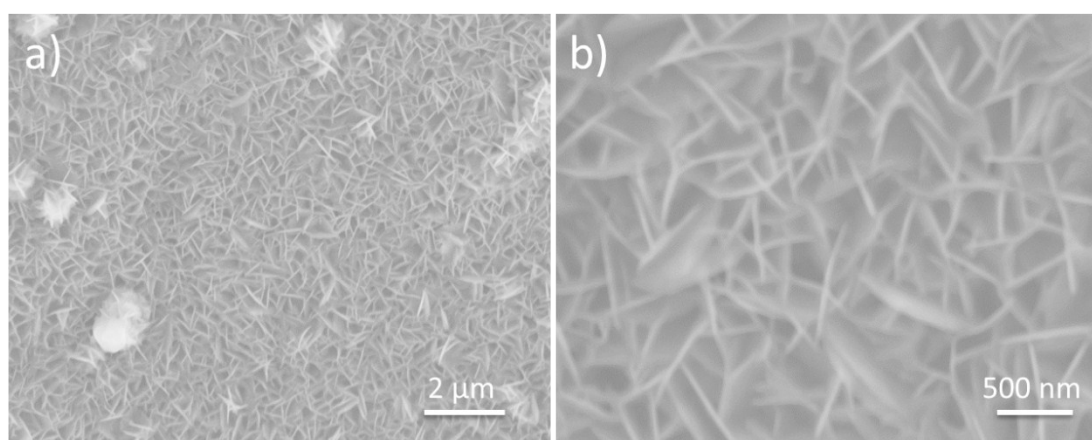

**Fig. S11.** SEM images of Ru/Ni(OH)<sub>2</sub>/NF after HER at 20 mA cm<sup>-2</sup> for 20 h.

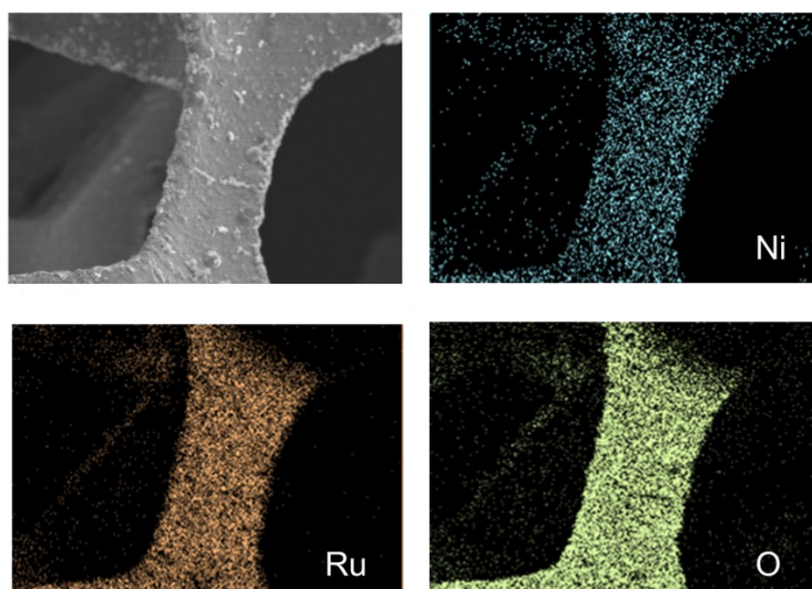

**Fig. S12.** SEM-mapping of Ru/Ni(OH)<sub>2</sub>/NF after HER at 20 mA cm<sup>-2</sup> for 20 h.



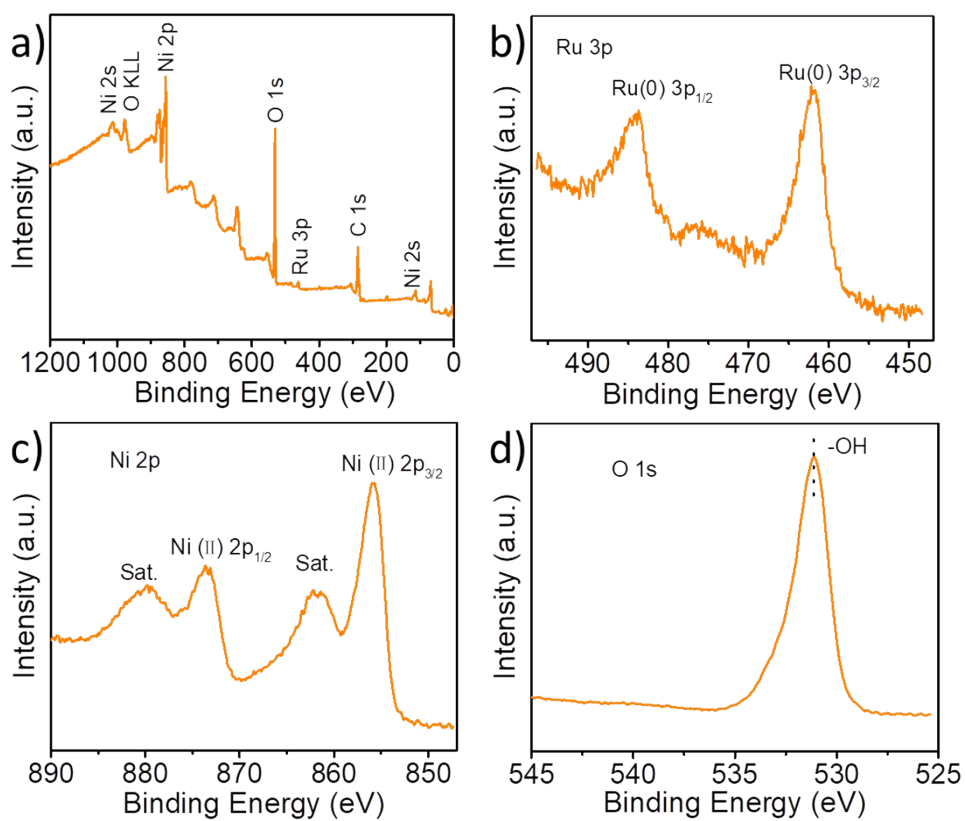

**Fig. S13.** XPS spectra of Ru/Ni(OH)<sub>2</sub> after HER at 20 mA cm<sup>-2</sup> for 20 h.

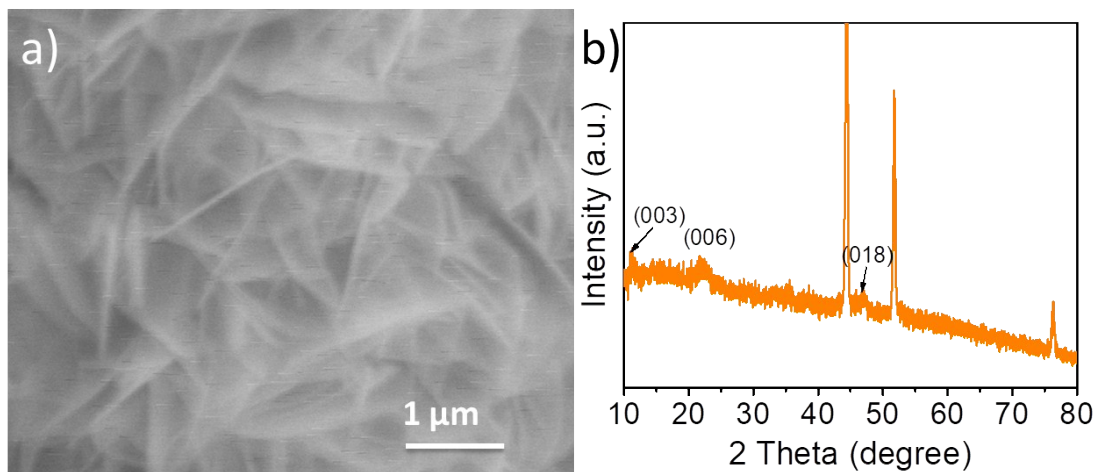

**Fig. S14.** SEM image (a) and XRD pattern (b) for NiFe LDH/NF.

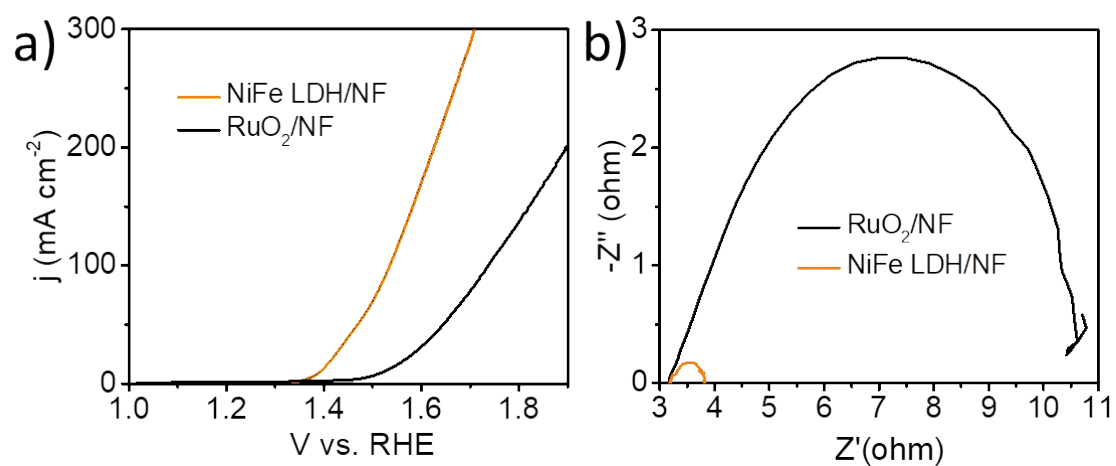

**Fig. S15.** LSV curves (a) and EIS spectra (b) for NiFe LDH/NF and RuO<sub>2</sub>/NF.

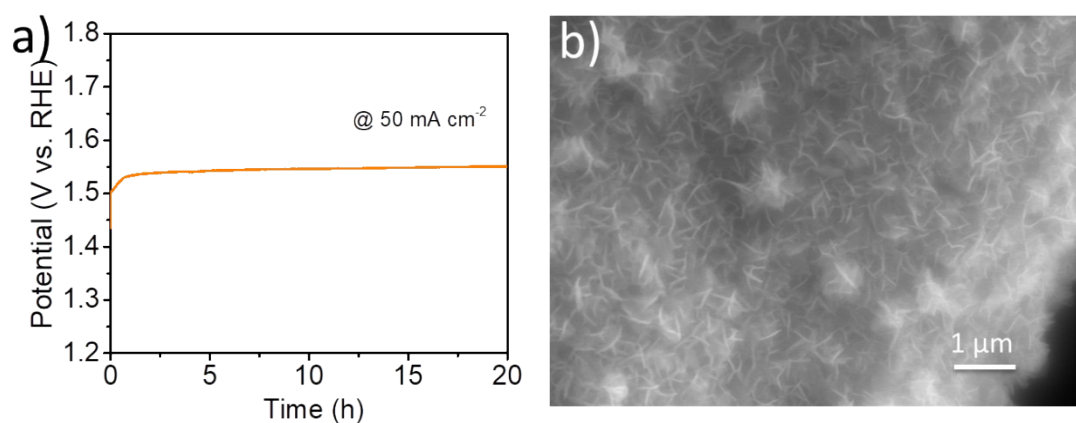

**Fig. S16.** (a) Chronopotentiometry test at 50 mA cm<sup>-2</sup> for NiFe LDH/NF. (b) SEM image of NiFe LDH/NF after OER at 50 mA cm<sup>-2</sup> for 20 h.

**Table S1.** pH values of solutions with different RuCl<sub>3</sub> concentrations.

| Concentration of RuCl <sub>3</sub> solution | pH value |
|---------------------------------------------|----------|
| 1.0 mM                                      | 4.00     |
| 2.5 mM                                      | 2.29     |
| 5.0 mM                                      | 2.09     |
| 15.0 mM                                     | 1.76     |
